# Supplementary material
Source: PubMed Central journal article supplement (PMC4715494)

1  
2  
3  
4  
5  
6  
7  
8  
9  
10  
11  
12  
13  
14  
15  
16  
17  
18  
19  
20  
21  
22  
23

**IgE Antibodies, FcεRIα and IgE-mediated Local Anaphylaxis Can Limit Snake Venom Toxicity**

Philipp Starkl, PhD<sup>a,\*</sup>, Thomas Marichal, DVM, PhD<sup>a,\*</sup>, Nicolas Gaudenzio, PhD<sup>a</sup>, Laurent Lionel Reber, PhD<sup>a</sup>, Riccardo Sibilano, PhD<sup>a</sup>, Mindy Tsai, DMSc<sup>a</sup> & Stephen Joseph Galli, MD<sup>a,b</sup>

From the Departments of <sup>a</sup>Pathology and <sup>b</sup>Microbiology & Immunology, Stanford University School of Medicine, Stanford, California, 94305; USA.

\* contributed equally to this work.

Correspondence and requests for reprints should be addressed to Stephen J. Galli, MD, Stanford University School of Medicine, Department of Pathology, 300 Pasteur Drive L-235, Stanford, CA 94305-5324 USA; Phone: +1 650 723 7975, Fax: +1 650 725 6902, email: sgalli@stanford.edu

P.S. was supported by a Max Kade Fellowship of the Max Kade Foundation and the Austrian Academy of Sciences and a Schroedinger Fellowship of the Austrian Science Fund (FWF): J3399-B21. T.M. was supported by a Marie Curie International Outgoing Fellowship for Career Development (Grant number 299954). N.G was supported by fellowships from the French “Fondation pour la Recherche Médicale FRM”. L.L.R. was supported by the Arthritis National Research Foundation (ANRF) and National Institutes of Health grant K99AI110645. R.S. was supported by a fellowship from the Lucile Packard Foundation for Children’s Health and the

24 Stanford NIH/NCRR CTSA award, number UL1 RR025744. This work was supported by  
25 National Institutes of Health grants AI023990, CA072074 and AI070813 (to S.J.G.) and by the  
26 Department of Pathology of Stanford University.

27

## 28 **Online Repository Methods**

### 29 **Mice**

30 All animal care and experiments were carried out in accord with current National  
31 Institutes of Health guidelines and with the approval of the Stanford University Institutional  
32 Animal Care and Use Committee. For experiments involving WT mice (Figs 1; 3, F-J; 5-7; E1;  
33 E2; E3, F-H; E5) and production of serum from WT mice (Figs 3, F-J; 4, F-H), age-matched 5 to  
34 7 week-old C57BL/6J or BALB/cJ female mice were purchased from Jackson Laboratories  
35 (Sacramento, CA) and were housed in the Research Animal Facilities at Stanford University for  
36 at least 7 days before starting experiments. All transgenic mouse strains were bred and housed  
37 with the respective (in house-bred) control mice in the Stanford Animal facilities under specific  
38 pathogen free conditions. C57BL/6-*Fcer1a*<sup>-/-</sup> mice were originally purchased from Jackson  
39 Laboratories. *Igh7*<sup>-/-</sup> and *Igh7*<sup>+/+</sup> control mice on the BALB/c background were described  
40 previously<sup>E1</sup> and were generously provided by Hans C. Oettgen (Harvard Medical School, MA,  
41 USA). *Igh7*<sup>-/-</sup> mice backcrossed 8 generations on the C57BL/6J background and littermate control  
42 mice were generously provided by Mitchell Grayson (Medical College of Wisconsin, WI, USA).  
43 MC-deficient C57BL/6-*Kit*<sup>W-sh/W-sh</sup> mice and MC- and basophil-deficient C57BL/6-*Cpa3*-  
44 *Cre;Mcl-1*<sup>fl/fl</sup> mice were previously described<sup>37, 39</sup>. We originally obtained previously described  
45 B6.129S4-*Mcpt8*<sup>tm1(cre)Lky/J</sup><sup>E2</sup> (referred to in Figure E3 as *Mcpt8-Cre*) and B6.129P2-  
46 *Gt(ROSA)26Sor*<sup>tm1(DTA)Lky/J</sup><sup>E2</sup> (referred to in Fig. E3 as *DTA*<sup>fl</sup>) from Jackson laboratories.

47 Homozygous *Mcpt8-Cre* mice were bred at Stanford with *DTA<sup>fl/-</sup>* mice in order to generate  
48 basophil-deficient *Mcpt8-Cre<sup>+/-</sup>;DTA<sup>fl/-</sup>* and basophil-sufficient *Mcpt8-Cre<sup>+/-</sup>;DTA<sup>-/-</sup>* littermates  
49 (blood basophil levels were analyzed for all mice prior to start of the immunization).

50 Age-matched male and female transgenic and control mice (with comparable gender  
51 distribution within the groups) were used for experiments.

52

### 53 **Reagents**

54 Russell's viper (*Daboia russelii*) venom (RVV) was obtained from Sigma (Carlsbad, CA)  
55 and was resuspended in sterile, endotoxin-free PBS (Gibco, Grand Island, NY) at 10 mg/ml. Two  
56 different RVV batches were used throughout this study that appeared to differ in their toxin  
57 composition (assessed by PAGE and coomassie blue stain; data not shown) and toxicity: Lot  
58 SLBB5602V (country of origin: China) and SLBK7058V (country of origin: Pakistan). Challenge  
59 with SLBK7058V resulted in notably lower mortality than injection of the same dose of  
60 SLBB5602V. Lot SLBB5602V was used for all experiments except those in Figs. 1, G and H,  
61 E2, E3, E6, which employed batch SLBK7058V. Honeybee (*Apis mellifera*) venom (Lot  
62 12071006HB) was obtained from ALK Abello Source Materials, Inc (Spring Mills, PE). Batches  
63 of freeze-dried complete BV were resuspended in PBS at 4 mg/ml. BV and RVV were stored in  
64 aliquots at -20°C. Dispase was from Gibco. Collagenase A and DNase I were from Roche. Aqua  
65 Dead Cell Stain Kit and propidium iodide were obtained from Life Technologies (Grand Island,  
66 NY). V450 (Pacific Blue equivalent)-conjugated anti-mouse CD49b (DX-5), fluorescein-  
67 conjugated anti-mouse CD117 (KIT) (clone 2B8) and allophycocyanin-cyanin7-conjugated anti-  
68 mouse Ly6G (clone 1A8; used for skin cell analysis) antibodies and phycoerythrin-TexasRed-  
69 conjugated streptavidin were from BD Biosciences (San Jose, CA), allophycocyanin-conjugated  
70 anti-mouse CD45 (clone 30-F11), anti-mouse Ly6G (Gr-1; fluorescein-conjugated clone RB6-

71 8C5 used for blood cell analysis in Fig E1); allophycocyanin-conjugated clone 1A8-Ly6g (used  
72 for analysis of neutrophil depletion), and allophycocyanin-conjugated anti-mouse F4/80 (clone  
73 BM8) antibodies were from eBioscience (San Diego, CA), phycoerythrin-conjugated anti-mouse  
74 FcεRIα (clone MAR-1) antibody and fluorescein-conjugated anti-mouse CD11b (clone M1/70;  
75 used in combination with 1A8-Ly6g for analysis of neutrophil depletion) were from Biolegend  
76 (San Diego, CA), biotin-conjugated anti-mouse Siglec-F (clone ES22-10D8) antibody was from  
77 Miltenyi Biotec (Bergisch Gladbach, Germany). Rat anti-mouse IgE (clone R35-92) and rat IgG<sub>1</sub>  
78 isotype control (clone R3-34) (used for experiments involving serum pre-treatment) were  
79 obtained from BD Pharmingen (San Jose, CA) and dialyzed twice against PBS prior to use in *in*  
80 *vivo* experiments. Clones and sources of antibodies used in ELISA experiments are stated in the  
81 respective section below. Dinitrophenyl (DNP)-specific IgE (α-DNP clone ε26<sup>46</sup>) was kindly  
82 provided by Dr. Fu-Tong Liu (University of California-Davis). DNP-specific mouse IgG<sub>1</sub> (clone  
83 109.3) and IgG<sub>2b</sub> (clone 10.12) were obtained from Santa Cruz Biotechnology (Santa Cruz, CA)  
84 and dialyzed twice against PBS before use in *in vivo* experiments. The specificity of dialyzed  
85 anti-DNP IgG antibodies for DNP-HSA (see below) was verified by ELISA (data not shown).  
86 Anti-ovalbumin (OVA) IgE (clone E-C1) was from Chondrex (Redmond, WA). Platelet  
87 activating factor (PAF) receptor antagonist CV-6209 was obtained from Santa Cruz  
88 Biotechnology, resuspended at 3.3 mg/ml in sterile saline and stored in aliquots at -20°C until  
89 use. Triprolidine hydrochloride, Dinitrophenyl<sub>30-40</sub>-conjugated human serum albumin (DNP-  
90 HSA) and other chemicals were obtained from Sigma.

91

## 92 **Venom injections and active immunization**

93 Six to 8 week old C57BL/6 and BALB/c WT or transgenic mice were shaved at the  
94 injection sites (back skin for RVV, back and belly skin for BV challenge) 24 h before injections

95 and were consistently treated in the morning (without anesthesia) by administering two s.c.  
96 injections of 50  $\mu$ l PBS alone or containing either 250  $\mu$ g RVV/ml (i.e., 2x 12.5  $\mu$ g; used for  
97 standard injections of mice prior to high dose RVV exposure), 500  $\mu$ g RVV/ml (i.e., 2x 25  $\mu$ g;  
98 used for comparing the responses of MC-deficient mice and corresponding MC-sufficient  
99 controls [Fig 2] and for testing the effect of immune serum transfer into C57BL/6-*Cpa3-Cre*;  
100 *Mcl-1<sup>fl/fl</sup>* mice [Fig 4]) or 750  $\mu$ g RVV/ml (i.e., 2x 37.5  $\mu$ g; used for challenges with a potentially  
101 lethal dose of RVV). Scratching behavior was quantified between 35 and 45 min after RVV  
102 injection as the number of scratching attempts with the hind legs per individual mouse. For  
103 experiments involving active “immunization” to RVV, mice were challenged 21 days after  
104 immunization. Body temperature was measured immediately before challenge and at indicated  
105 time intervals after challenge (in surviving mice), using a rectal thermometer.

106 For experiments investigating the effect of two sequential exposures to RVV on  
107 subsequent resistance to high dose RVV challenge (Fig 6), C57BL/6 and BALB/c mice were  
108 injected (1) on each of days 0 and 21 with 2 s.c. injections of 50  $\mu$ l PBS (control mice, referred to  
109 as PBS-PBS), (2) on day 0 with 2 s.c. injections of 12.5  $\mu$ g RVV in 50  $\mu$ l PBS and on day 21  
110 with 2 s.c. injections of 50  $\mu$ l PBS (referred to as RVV-PBS mice), or (3) on each of days 0 and  
111 21 with 2 s.c. injections of 12.5  $\mu$ g RVV in 50  $\mu$ l PBS (referred to as RVV-RVV mice). At day  
112 42, all mice were challenged with 2x 37.5  $\mu$ g BV in 50  $\mu$ l PBS. If in a particular independent  
113 challenge experiment shown in Fig 6 more than 50% of the control mice injected only with PBS  
114 on day 0 and day 21 exhibited a drop in body temperature of less than 4°C for C57BL/6 mice or  
115 less than 3°C for BALB/c mice by one h following injection of 2x 37.5  $\mu$ g RVV (we occasionally  
116 observed such variation in the response, that might be due to the greater age and weight of these  
117 mice as compared mice that were challenged 21 days after initial injections), all the mice in that  
118 experiment then received a single additional s.c. injection of 25  $\mu$ g RVV in 50  $\mu$ l PBS in the back

119 skin. We used this approach in order to achieve sufficient mortality in the mock-immunized (i.e.,  
120 PBS-PBS) control animals to allow identification of potential resistance in the two groups of  
121 RVV-immunized mice. As in our prior study<sup>21</sup>, all venom injections were performed by a team of  
122 2 experimenters working together (to enable better control of the mice during the injections) and  
123 experiments were designed and performed to allow the injection of all animals in any single  
124 experiment within minutes. For analysis of venom-induced antibody responses, blood was  
125 collected at day 14 (in experiments involving challenge after 21 days) or at day 35 (in  
126 experiments involving challenge after 42 days) from the retro-orbital vein of anesthetized mice.  
127 In experiments investigating the effects of two sequential exposures to BV on subsequent  
128 resistance to high dose BV challenge (Fig 7), C57BL/6 and BALB/c mice were injected (1) on  
129 each of days 0 and 21 with 2 s.c. injections into the back skin, each consisting of 50 µl PBS  
130 (control mice, referred to as PBS-PBS), (2) on day 0 with 2 s.c. injections of 200 µg BV for  
131 C57BL/6 mice or 1x 100 µg BV for BALB/c mice, each injection in 50 µl PBS, and on day 21  
132 with 2 s.c. injections into the back skin, each consisting of 50 µl PBS (referred to as BV-PBS  
133 mice), or (3) on each of days 0 and 21 with 2 s.c. injections of 200 µg BV for C57BL/6 mice or  
134 1x 100 µg BV for BALB/c mice, each injection in 50 µl PBS (referred to as BV-BV mice). These  
135 amounts of BV were selected because we showed previously that they resulted in significantly  
136 increased resistance to challenge with a potentially lethal BV dose 21 days later<sup>21</sup>. At day 42,  
137 C57BL/6 mice were challenged s.c. with 4x 200 µg BV, each of the 4 injections in 50 µl PBS (3  
138 in back skin, 1 in belly skin) and BALB/c mice were challenged with 5x 200 µg BV, each of the  
139 5 injections in 50 µl PBS (4 in back skin, 1 in belly skin). These challenge protocols caused death  
140 in ~70-90% of 6-8 week old animals as determined in previous dose finding experiments<sup>21</sup>. Body  
141 temperature was measured immediately before challenge and at indicated time intervals after  
142 challenge (in surviving mice), using a rectal thermometer.

143

144 **Passive immunization – serum preparation and transfer**

145 For experiments presented in Fig 3, F-J, and Fig 4, F-H, 6 to 8 week-old female WT  
146 C57BL/6J “donor” mice were immunized by 2 s.c. injections (in the back skin) of 12.5 µg RVV  
147 in PBS or with PBS alone. Three weeks later, blood was collected and sera of PBS- and RVV-  
148 injected mice were recovered after centrifugation in Serum-Gel Microtubes (Sarstedt,  
149 Neumbrecht, Germany). Following quantification of antibody levels (as described above), sera  
150 were pooled and aliquoted for later use in treatment groups of 5 mice (~1.3 ml/group) and stored  
151 at –20°C. Aliquots of pooled serum derived from “donor” mice which had been injected with  
152 either PBS or RVV are referred to as PBS-serum or RVV-serum, respectively. On average, the  
153 amount of serum obtained from two “donor” mice at this age (i.e., a total of ~750 µl) was  
154 sufficient for i.v. transfer into three “recipient” naïve mice.

155 For experiments shown in Fig 3, I-J, sera were modified immediately before the transfer  
156 as described previously<sup>21</sup>: (1) serum from PBS mock-immunized mice (PBS-serum) was  
157 supplemented with 1/10 volume (50 µg/ml final concentration) of the rat IgG<sub>1</sub> isotype control  
158 antibody (clone R3-34; BD Pharmingen; dialyzed overnight against 2x 5 L of PBS to remove  
159 sodium azide); (2) serum from RVV-immunized mice (RVV-serum) was supplemented with 1/10  
160 volume of dialyzed rat IgG<sub>1</sub> isotype control antibody and not further treated prior to transfer  
161 (RVV-serum); (3) RVV-serum was supplemented with 1/10 volume of dialyzed rat IgG<sub>1</sub> isotype  
162 control antibody and heated 60 min at 56°C in a water bath (heated BV-serum), in order to  
163 specifically ablate IgE function<sup>21, 41, 42, E3, E4</sup>; (4) RVV-serum was supplemented with 1/10 volume  
164 of rat anti-mouse IgE antibody (clone R35-92 [this particular clone is commonly used to  
165 neutralize cell-mediated IgE function *in vivo*<sup>21, E5, E6</sup>], BD Pharmingen; dialyzed overnight against  
166 2x 5 L of PBS to remove sodium azide) for 30 min at room temperature (Anti-IgE RVV-serum).

167 Aliquots of these modified sera (250 µl/mouse) were transfused i.v. via the retro-orbital vein into  
168 anesthetized 10 to 11 week-old female C57BL/6 “recipient” naïve mice. On the following day, all  
169 “recipient” mice were challenged with 2 s.c. injections of 37.5 µg RVV in PBS. We measured  
170 body temperature at the indicated times and monitored survival over one week.

171 For experiments involving serum transfer into MC-deficient recipient mice (Fig 4, F-H),  
172 naïve\_C57BL/6-*Cpa3-Cre;Mcl-1<sup>fl/fl</sup>* mice received serum generated from C57BL/6J WT mice and  
173 were challenged with 2x 25 µg RVV in PBS.

174

### 175 **Histology and assessment of MC degranulation**

176 Back skin specimens were removed carefully to avoid stretching or compressing the specimens  
177 (that can increase artifactual changes in MC morphology) and were fixed with 10% formalin and  
178 embedded in paraffin, and 4-µm sections were stained with 0.1% Toluidine blue or Hematoxylin  
179 & Eosin for histologic examination. Images were captured with a Nikon (Belmont, CA) E1000M  
180 microscope using a Spotflex camera and Spot version 5.1 software (Diagnostic Instruments,  
181 Sterling Heights, MI). MC degranulation is expressed as the % of the skin MCs examined in  
182 which >50% (“Extensive” degranulation of that cell), 10-50% (“Moderate” degranulation of that  
183 cell) or <10% (“None”, indicative of no evidence of significant degranulation of that cell) of the  
184 cytoplasmic granules of individual MCs exhibited morphological evidence of degranulation, i.e.,  
185 alterations in the staining characteristics, size or distribution of the granules<sup>16,21</sup>. The data are  
186 presented as bar graphs of the % of MCs exhibiting the various extents of degranulation  
187 (mean+SEM), and the differences between results were examined for statistical significance  
188 using the Chi square test.

189

### 190 **ELISAs**



191 After each incubation step in the ELISAs described below, plates are washed 3-5 times  
192 using PBS containing 0.05% tween. For detection of venom-specific IgG<sub>1</sub> serum antibodies,  
193 Nunc MaxiSorp ELISAs plates (Thermo Scientific, Waltham, MA) were coated with whole RVV  
194 or BV diluted to 5 µg/ml PBS at 4°C overnight, followed by blocking with 1% bovine serum  
195 albumin (BSA) in PBS for at least 2 h at room temperature. Sera were diluted in PBS containing  
196 1% BSA and incubated in the blocked wells for 2 h at 37°C or overnight at 4°C. We detected  
197 bound IgG<sub>1</sub> using a biotinylated detection antibody (rat anti-mouse IgG<sub>1</sub> [clone A85-1, BD  
198 Pharmingen; incubated for 1 h at room temperature]), followed by incubation with horseradish  
199 peroxidase-conjugated streptavidin (BD Pharmingen) for 20 min at room temperature and  
200 detection of the reaction product after using supersensitive TMB substrate (Sigma). Antibody  
201 titers were calculated by plotting the serum dilution that gave half-maximal signal of a reference  
202 serum. When the detected signal gave a corresponding titer < or = to 1, an arbitrary value of 1  
203 was assigned.

204 For determination of absolute amounts of total serum IgE, we coated ELISA plates with  
205 rat anti-mouse IgE [clone R35-72, BD Biosciences, at 2 µg/ml], followed by blocking as  
206 described above. We incubated coated and blocked wells with serial dilutions of purified mouse  
207 IgE (BD Pharmingen) as standard and 1:10 diluted sera (in PBS 1% BSA) for 2 h at 37°C or  
208 overnight at 4°C. Bound IgE was detected using biotinylated anti-mouse IgE (clone R35-118, BD  
209 Pharmingen) and reagents as described above.

210

## 211 **Generation and analysis of degranulation of bone marrow-derived cultured mast cells** 212 **(BMCMCs)**

213 Mast cells were generated from the bone marrow cells of female age-matched C57BL/6 or  
214 BALB/c mice by (simultaneous) culture for 10 weeks in WEHI-conditioned, IL-3 containing

215 medium until a mast cell purity of ~95 % was reached as previously described<sup>21</sup>. In order to  
216 analyze the sensitization potential of immune sera (Fig E6), BMCMCs were sensitized overnight  
217 with serum pools derived from three independent experiments (the same serum pools were used  
218 in Fig 7, F-G for assessment of PLA<sub>2</sub>-specific IgE), followed by 1 h stimulation without or with  
219 BV at the indicated concentrations in Tyrode's buffer. The percentage of release of the mast cell  
220 granule-stored enzyme  $\beta$ -hexosaminidase in the supernatants of BMCMCs was measured as  
221 previously described<sup>21</sup>.

## 222

### 223 **Pharmacologic blocking of histamine and platelet activating factor (PAF) in mice exhibiting** 224 **RVV-mediated hypothermia**

225 Potential contributions of histamine and PAF to the hypothermia observed upon RVV  
226 injection were analyzed by specific neutralization of these mediators following a previously  
227 described method<sup>E7</sup>, with slight modifications: the H1-receptor-specific antihistamine triprolidine  
228 was solubilized at 1 mg/ml in sterile saline and filter-sterilized and 200  $\mu$ l was injected into mice  
229 intraperitoneally 1 h prior to venom injections. The PAF receptor antagonist CV-6209 was  
230 diluted at 330  $\mu$ g/ml in saline and 200  $\mu$ l were injected into the retro-orbital vein of anesthetized  
231 mice 30 min prior to venom injections (particular care was taken that all mice were exposed to  
232 the isoflurane anesthesia for the same amount of time [i.e., 2.5 – 3 minutes]). All mice were  
233 allowed to recover from the anesthesia (they were exposed to an infra-red lamp for 5 min directly  
234 after anesthesia) for the same period of time. Recovery from the anesthesia by all mice (i.e.,  
235 reaching a body temperature of at least 37°C) was verified before injecting 2x 37.5  $\mu$ g RVV (lot  
236 SLBK7058V) and monitoring temperature and survival as described above.

237

### 238 **Antibody-mediated neutrophil depletion**

239 For assessment of the potential role of neutrophils in the type 2 immune response against  
240 RVV, C57BL/6 mice were injected intraperitoneally with 150 µg anti-GR-1 antibody (clone  
241 RB6-8C5, BioXCell, West Lebanon, NH) for neutrophil depletion<sup>E8, E9</sup> or an isotype control  
242 antibody (clone LTF-2, BioXCell) in 100 µl PBS or with PBS alone (vehicle). These injections  
243 were started 3 d prior to immunization with 2x 12.5 µg RVV and continued every other day until  
244 collection of serum 14 d after immunization. Starting with day 1 after immunization, a drop of  
245 blood was collected from the tail of the mice and levels of neutrophils were assessed as described  
246 above immediately before antibody injection in order to confirm (sustained) neutrophil depletion  
247 by flow cytometry using anti-mouse Ly-6G (clone 1A8-Ly6g) combined with anti-mouse CD11b  
248 antibodies. In the experiments shown in Fig E3, F and G, levels of neutrophils in the blood of all  
249 groups of mice treated with anti-GR-1 antibody ranged from undetectable to <1% of blood cells  
250 at all times tested. In the PBS-treated or isotype control antibody-treated mice, blood levels of  
251 neutrophils ranged from 2-30% over the time period tested (with the highest levels seen on days 1  
252 or 3 after immunization with RVV).

253

#### 254 **Biotinylation of RVV and bvPLA<sub>2</sub>**

255 RVV and bvPLA<sub>2</sub> (Sigma) (each at a stock concentration of 4 mg/ml in PBS) were mixed  
256 1:1 with (+)-Biotin N-hydroxysuccinimide ester (stock concentration of 2 mg/ml in dimethyl  
257 sulfoxide) and incubated at room temperature for 2 h. One volume of 0.1 M TRIS pH 7 was  
258 added for 10 min to quench the reaction. The reaction mixture was dialyzed 2x overnight at 4°C  
259 against PBS using Slide-A-Lyzer Dialysis Cassettes (2K MWCO, Pierce, Rockford, IL), followed  
260 by desalting using Zeba Spin Desalting Columns (7K MWCO, Pierce). Biotinylated proteins  
261 were stored at -20°C. Optimal dilutions (resulting in highest signal-to-noise ratio) of biotinylated  
262 proteins and horseradish peroxidase-conjugated streptavidin for detection of specific IgE

263 antibodies in ELISA experiments (described above) were determined in pilot experiments using  
264 control serum from naïve mice and serum pools with high IgE content (derived from mice that  
265 had been immunized and challenged with RVV or BV).

266

### 267 **DNP-HSA-specific IgE-dependent passive cutaneous anaphylaxis**

268 To test the effects of a local IgE-dependent anaphylactic reaction against an irrelevant  
269 antigen on resistance of mice to a potentially lethal challenge with RVV, a model of IgE-  
270 dependent passive cutaneous anaphylaxis was established in the back skin of C57BL/6 and  
271 BALB/c mice. Six to 8 week-old C57BL/6J and BALB/cJ mice were sensitized with three s.c.  
272 injections into the back skin of 50 µl Saline alone or containing 50 ng anti-DNP IgE antibody.  
273 For experiments shown in Fig E5, mice were anesthetized 18 h later and injected intravenously  
274 with 200 µl PBS containing 1% Evan's blue dye and challenged 30 min later by two s.c.  
275 injections of 50 µl PBS containing either 0.1 µg or 0.5 µg DNP-HSA. Changes in body  
276 temperature were monitored during the first 30 min. Specimens of 1 cm<sup>2</sup> size of back skin  
277 including the s.c. injection sites were collected 1 h after challenge and sacrifice of the mice,  
278 minced into 4 equally sized pieces and incubated in 300 µl DMSO in a 48 well plate for 90 min  
279 on a shaker at room temperature. The absorption of the supernatant at 620 nm was analyzed to  
280 assess levels of extracted Evan's blue dye. For experiments shown in Fig. 5, E5, G-I, and E6, 18  
281 h after sensitization with 3x 50 ng anti-DNP IgE antibody (or, in Fig. 5, with the same amount of  
282 an anti-DNP IgG<sub>1</sub> or anti-DNP IgG<sub>2b</sub> antibody or, in Fig. E6, with 3x 50 ng anti-DNP IgE  
283 antibody alone or mixed with 500 ng anti-ovalbumin (OVA) IgE, or with 3x 500 ng anti-OVA  
284 IgE alone, or with saline alone as a mock sensitization), mice were challenged with 2 s.c.  
285 injections, each consisting of 50 µl PBS containing 37.5 µg RVV and 0.5 µg DNP-HSA.

286

287 **Treatment of skin and blood samples for flow cytometry analysis**

288 For assessment of skin immune cell infiltration following RVV injection (Fig 1, C,D),  
289 skin samples of 1 cm<sup>2</sup> including the injection sites were dissected after sacrifice of the mice and  
290 transferred into a dispase solution (2.5 U/ml in Hank's buffered saline solution [HBSS]) for 90  
291 min at 37°C. The epidermis was removed with forceps, and the dermis was cut into small pieces  
292 and digested for 60 min at 37°C on a shaker at 200 rpm in 2 ml DMEM medium containing 20  
293 mM HEPES, 396 U/mL DNase I and 1 mg/ml collagenase A. Cell aggregates were further  
294 mechanically disrupted by passing them through a 18G needle, and the cell suspension was  
295 filtered through a 70 µm cell strainer.

296 After red blood cell lysis using ACK buffer, skin dermal cells and white blood cells  
297 were stained with Aqua Dead Cell Stain Kit or propidium iodide, respectively, to label dead cells,  
298 followed by incubation with an anti-mouse CD16/CD32 (clone 2.4G2; obtained from BD  
299 Biosciences) antibody to reduce non-specific binding before staining. Cells were kept at 4°C  
300 during processing. We analyzed white blood cells with an Accuri C6 flow cytometer (BD  
301 Biosciences) and skin dermal samples with an LSR-II flow cytometer (BD Biosciences) at the  
302 Stanford University Flow Cytometry Core Facility. Skin neutrophils were defined as CD45<sup>+</sup>  
303 Ly6G<sup>+</sup> Siglec-F<sup>-</sup> cells, blood neutrophils as CD45<sup>+</sup> Ly6G<sup>high</sup> F4/80<sup>-</sup> cells, skin eosinophils as  
304 CD45<sup>+</sup> Ly6G<sup>int</sup> Siglec-F<sup>+</sup> cells and skin basophils as CD45<sup>+</sup> FcεRIα<sup>+</sup> CD49b<sup>+</sup> c-Kit<sup>-</sup> cells. Blood  
305 monocytes were defined as CD45<sup>+</sup> F4/80<sup>int</sup> Ly6G<sup>int</sup> cells. Results were analyzed using FlowJo  
306 software (Tree Star, Ashland, OR).

307

308 **Statistical analysis**

309 Statistical tests were performed using the software GraphPad PRISM 6 (Graphpad  
310 Software, San Diego, CA). Two-tailed Student's *t*-test (unpaired), Mann-Whitney test, Mantel-

311 Cox or Chi-Square tests were performed as noted in the respective figure legends. ns, not  
312 significant ( $P > 0.05$ ); \*,  $P < 0.05$ ; \*\*,  $P < 0.01$ ; \*\*\*,  $P < 0.001$ . Unless otherwise specified, data  
313 are shown as mean+SEM or mean±SEM.

314

## 315 **Online Repository Figure Legends**

316

317 **Fig E1.** Subcutaneous RVV induces systemic neutrophilia. **A**, Flow cytometry plots of blood  
318 neutrophils (CD45<sup>+</sup> Ly6G<sup>high</sup> F4/80<sup>-</sup>), and **B**, Percentages (mean+SD, n=3) of blood neutrophils at  
319 indicated times following injection. Numbers indicate % of gated cells in total subpopulation.  
320 Data in **A** are from one mouse/panel and are representative of three mice per group. *P* values:  
321 Student's *t* test.

322

323 **Fig E2.** Effects of triprolidine or CV-6209 pre-treatment on responses to RVV in BALB/c mice.  
324 **A**, Experimental outline. **B**, Temperature (right panel magnifies area in dashed box) and **C**,  
325 Survival. *P* values: Student's *t* test (*B*); Mantel-Cox test (*C*). Data pooled from 2 experiments.  
326 Symbols in (*B*): comparison of group in that color with vehicle-treated mice for that time point.

327

328 **Fig E3.** Assessment of roles of basophils, MCs and neutrophils in type 2 humoral responses to  
329 RVV. **A**, Experimental outline (*B-E*). **B-E**, Serum RVV-specific IgG<sub>1</sub> (*B,D*) and total IgE (*C,E*)  
330 in (*B,C*) basophil-deficient *Mcpt8-Cre*<sup>+/-</sup>; *DTA*<sup>fl/-</sup> and control basophil-sufficient *Mcpt8-Cre*<sup>+/-</sup>  
331 ; *DTA*<sup>-/-</sup> mice and in (*D,E*) MC- and basophil-deficient *Cpa3-Cre*<sup>+</sup>; *Mcl-1*<sup>fl/fl</sup> and corresponding  
332 control mice. **F**, Experimental outline (*G,H*). **G,H**, Serum RVV-specific IgG<sub>1</sub> (*G*) and total IgE  
333 (*H*) in neutrophil-depleted anti-GR-1-treated (see Methods for extent of neutrophil depletion),

334 isotype antibody control-treated, and PBS-treated C57BL/6 mice. Data are pooled from 2-4  
335 experiments (n=6-18/group). *P* values: Mann-Whitney test.

336  
337 **Fig E4.** IgE contributes to acquired resistance to RVV-induced toxicity in BALB/c mice. **A**  
338 Outline of experiments with IgE-deficient (*Igh-7<sup>-/-</sup>*) and *Igh-7<sup>+/+</sup>* mice. **B,C**, Serum RVV-specific  
339 IgG<sub>1</sub> (**B**) and total IgE (**C**). **D,E**, body temperature (**D**) and survival (**E**). Data are pooled from 3  
340 experiments (n= 16-19/group). *P* values: Mann-Whitney test (**B-C**); Student's *t* test (**D**); Mantel-  
341 Cox test (**E**).

342  
343 **Fig E5.** Passive cutaneous anaphylaxis to an irrelevant antigen can increase resistance to a  
344 potentially lethal challenge with RVV. **A-D**, C57BL/6 and BALB/c mice received 3 s.c.  
345 injections of 50 µl saline alone or containing 50 ng anti-DNP IgE antibody on the shaved back  
346 skin. 18 h later, mice were injected intravenously with 200 µl PBS containing 1% Evan's blue  
347 dye and challenged 30 min later by 2 s.c. injections of 50 µl PBS containing 0.5 µg DNP-HSA,  
348 administered to the site of prior injection of anti-DNP IgE or saline. **A,C**, body temperature after  
349 DNP-HSA challenge. **B,D**, extravasation of intravascular fluid into the skin at the site of DNP-  
350 HSA challenge 1 h after challenge as assessed by levels of Evan's blue dye. **E,F**, body  
351 temperature (**E**) and survival (**F**) of C57BL/6 mice following 2 s.c. injections of 37.5 µg RVV  
352 mixed with 0.5 µg DNP-HSA or vehicle. **G**, Experimental outline for (**H,I**). **H,I**, body  
353 temperature (**H**) and survival (**I**) of BALB/c mice treated with 3 s.c. injections of 50 µl saline  
354 alone or containing 50 ng anti-DNP IgE antibody and challenged 18 h later with 2 s.c. injections,  
355 each of 50 µl PBS containing 37.5 µg RVV and 0.5 µg DNP-HSA. Data are pooled from 2-3  
356 experiments (n=6-15/group). *P* values: Student's *t* test (**B, D, H**); Mantel-Cox test (**I**).

357

358 **Fig E6.** Eliciting passive cutaneous anaphylaxis-mediated resistance against RVV depends on  
359 employing an antigen-specific IgE. **A**, Experimental outline. **B,C**, Body temperature (*B*) and  
360 survival (*C*) of IgE-deficient (*Igh-7<sup>-/-</sup>*) C57BL/6 mice treated with 3 s.c. injections of saline alone  
361 or containing 50 ng of anti-DNP IgE alone, 50 ng of anti-DNP IgE mixed with 500 ng of anti-  
362 OVA IgE, or 500 ng of anti-OVA IgE antibody alone and challenged 18 h later with 2 s.c.  
363 injections, each containing 37.5 µg RVV and 0.5 µg DNP-HSA. Data are pooled from 3  
364 independent experiments (n=7/group). *P* values: Student's *t* test (*B*); Mantel-Cox test (*C*).

365  
366 **Fig E7.** BV induces similar degranulation responses in bone marrow-derived cultured mast cells  
367 (BMCMCs) derived from C57BL/6 or BABL/c mice after their sensitization with BV-immune  
368 serum derived from either C57BL/6 or BABL/c mice. **A,B**, BMCMCs were sensitized overnight  
369 with pooled immune serum collected on day 42 from PBS-PBS, BV-PBS or BV-BV immunized  
370 C57BL/6 or BALB/c mice (these were the same sera used for measurements of PLA<sub>2</sub>-specific  
371 IgE in Fig 7, F-G). Percentage of β-hexosaminidase released was measured 1 h after exposure to  
372 BV. (*B*) Shows selected data from (*A*) to allow side-by-side comparison of results from C57BL/6  
373 and BALB/c BMCMCs (none of the responses to any of the concentrations of BV tested were  
374 significantly different in the BMCMCs derived from the two mouse strains). Data pooled from  
375 three independent experiments employing the same batch of BMCMCs tested on different days  
376 but each of the three experiments using a different batch of serum pooled from 3 independent  
377 immunizations. *P* values: Student's *t* test.

378

379

380

381



382 **Online Repository References**

- 383
- 384 E1. Oettgen HC, Martin TR, Wynshaw-Boris A, Deng C, Drazen JM, Leder P. Active  
385 anaphylaxis in IgE-deficient mice. *Nature* 1994; 370:367-70.
- 386 E2. Sullivan BM, Liang HE, Bando JK, Wu D, Cheng LE, McKerrow JK, et al. Genetic  
387 analysis of basophil function in vivo. *Nature immunology* 2011; 12:527-35.
- 388 E3. Ishizaka T, Helm B, Hakimi J, Niebyl J, Ishizaka K, Gould H. Biological properties of a  
389 recombinant human immunoglobulin  $\epsilon$ -chain fragment. *Proc Natl Acad Sci U S A* 1986;  
390 83:8323-7.
- 391 E4. Wakayama H, Hasegawa Y, Kawabe T, Saito H, Kikutani H, Shimokata K. IgG-mediated  
392 anaphylaxis via Fc $\gamma$  receptor in CD40-deficient mice. *Clin Exp Immunol* 1998; 114:154-  
393 60.
- 394 E5. Amiri P, Haak-Frendscho M, Robbins K, McKerrow JH, Stewart T, Jardieu P. Anti-  
395 immunoglobulin E treatment decreases worm burden and egg production in *Schistosoma*  
396 *mansoni*-infected normal and interferon  $\gamma$  knockout mice. *J Exp Med* 1994; 180:43-51.
- 397 E6. Haak-Frendscho M, Saban R, Shields RL, Jardieu PM. Anti-immunoglobulin E antibody  
398 treatment blocks histamine release and tissue contraction in sensitized mice. *Immunology*  
399 1998; 94:115-21.
- 400 E7. Strait RT, Morris SC, Yang M, Qu XW, Finkelman FD. Pathways of anaphylaxis in the  
401 mouse. *J Allergy Clin Immunol* 2002; 109:658-68.
- 402 E8. Jonsson F, Mancardi DA, Kita Y, Karasuyama H, Iannascoli B, Van Rooijen N, et al.  
403 Mouse and human neutrophils induce anaphylaxis. *J Clin Invest* 2011; 121:1484-96.

- 404 E9. Khodoun MV, Kucuk ZY, Strait RT, Krishnamurthy D, Janek K, Clay CD, et al. Rapid  
405 desensitization of mice with anti-FcγRIIb/FcγRIII mAb safely prevents IgG-  
406 mediated anaphylaxis. *J Allergy Clin Immunol* 2013; 132:1375-87.  
407

**A**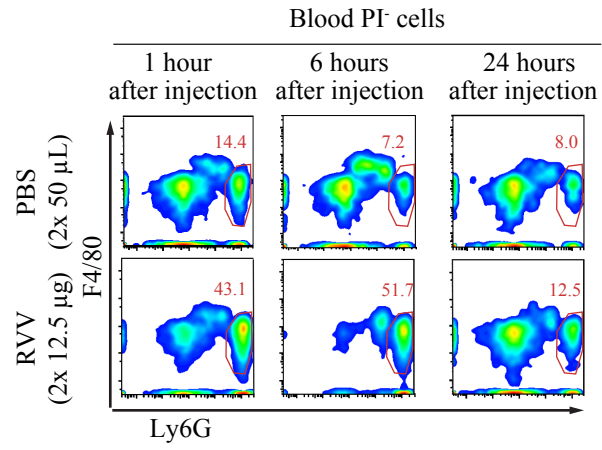**B**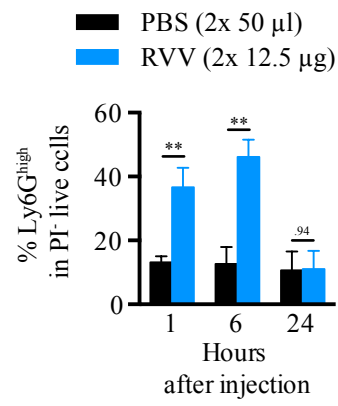

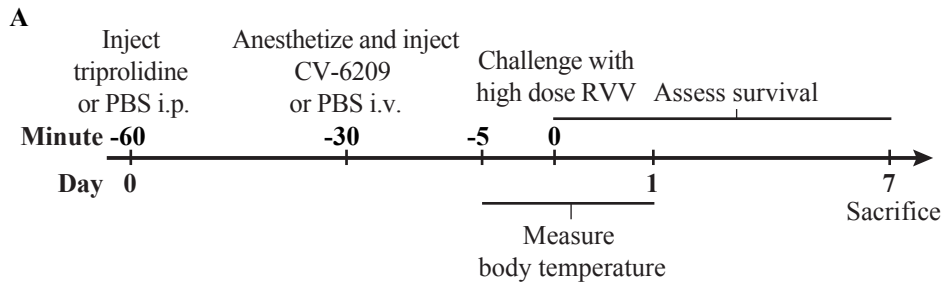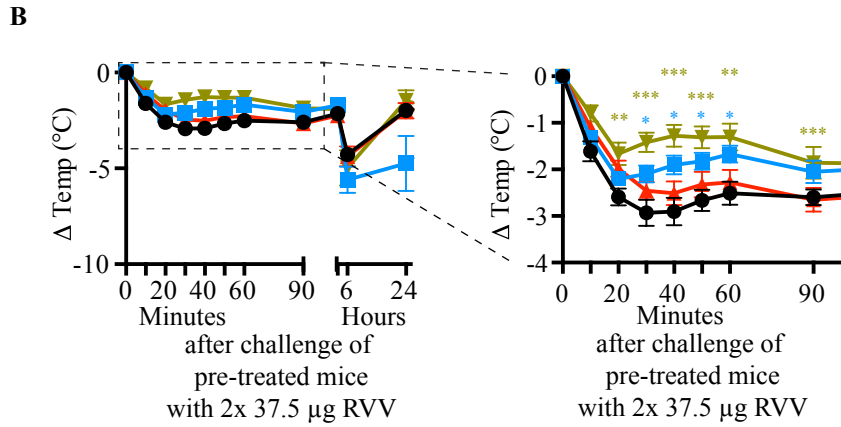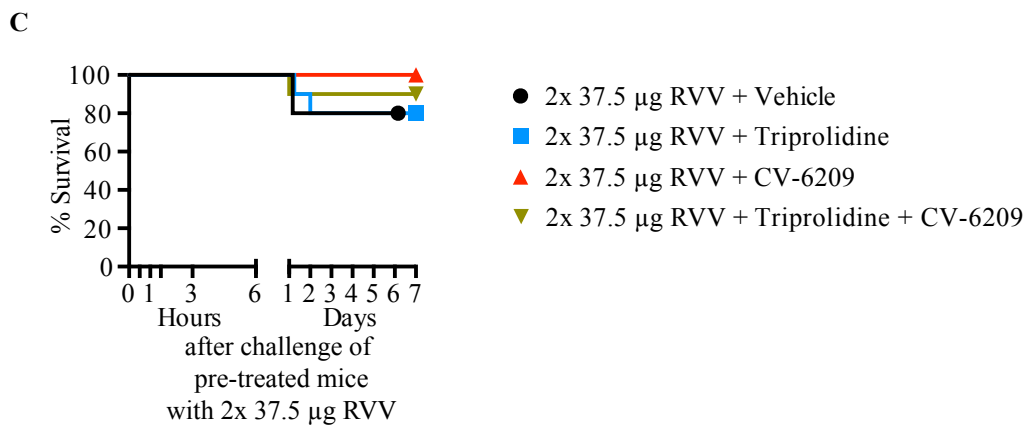



**A**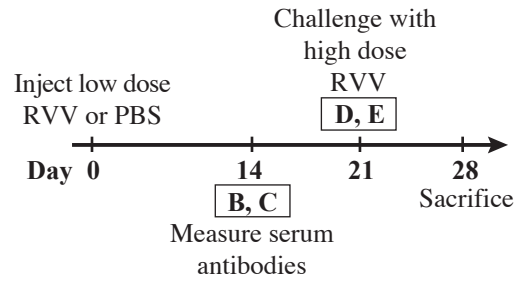**B**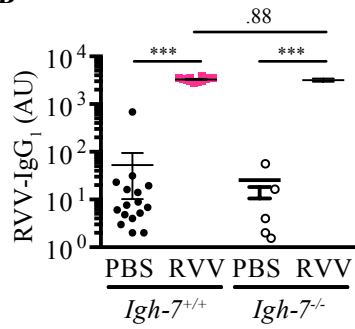**C**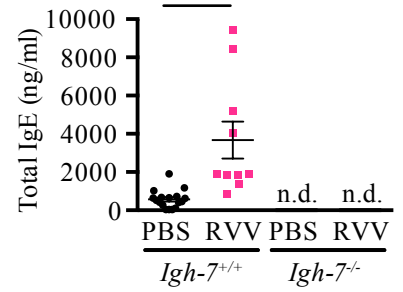**D**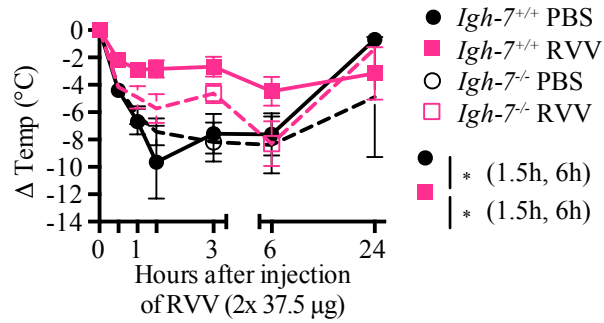**E**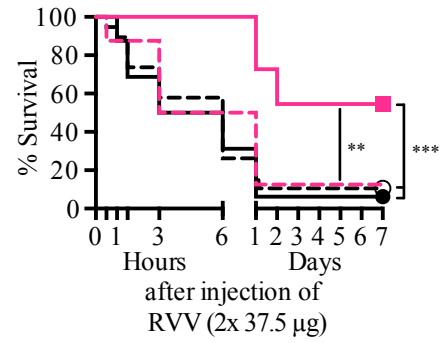

|           | Sensitization | Challenge                |
|-----------|---------------|--------------------------|
| ●         | Saline        | DNP-HSA (2x 0.5 $\mu$ g) |
| ▼ C57BL/6 | Anti-DNP IgE  | DNP-HSA (2x 0.5 $\mu$ g) |
| ▼ BALB/c  |               |                          |

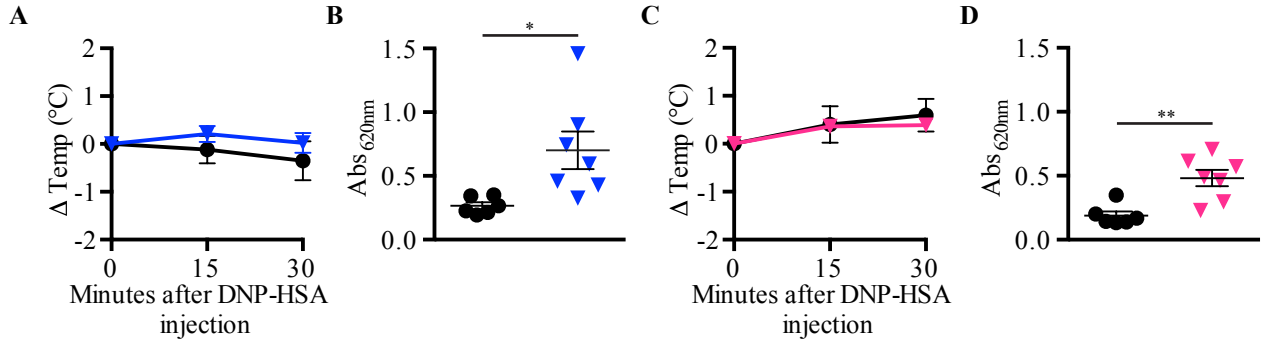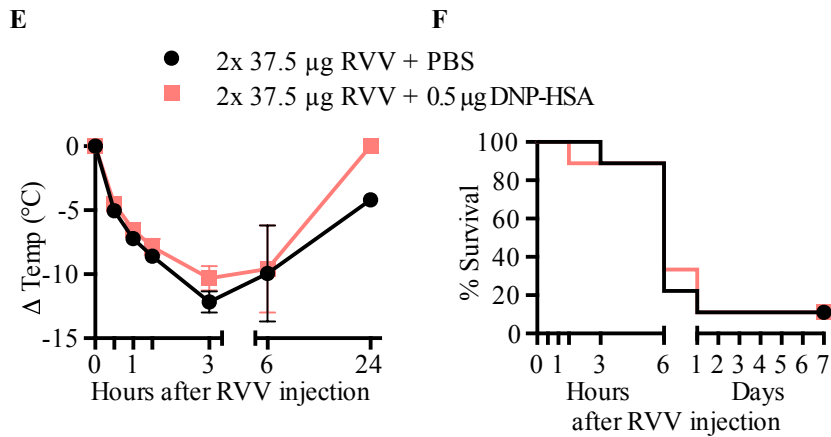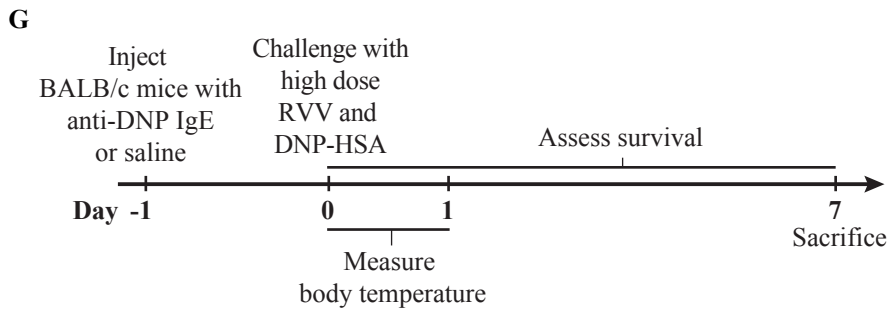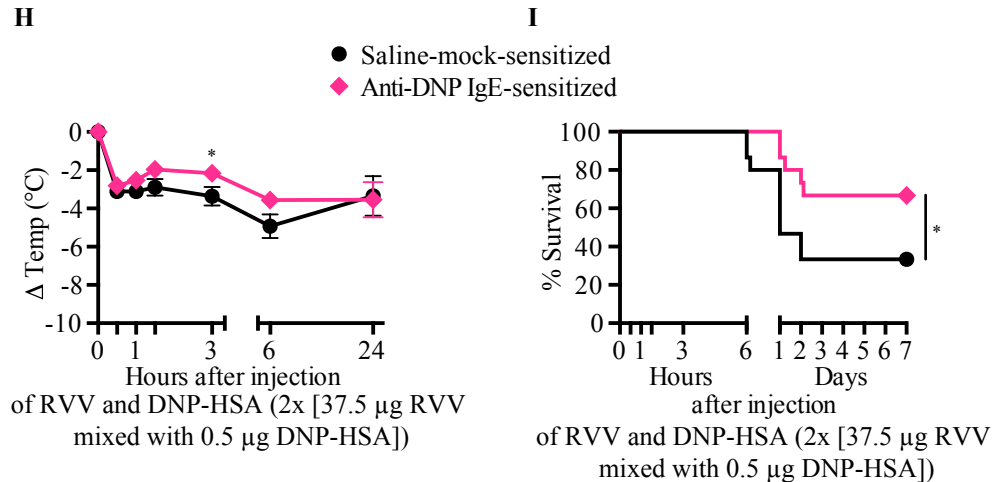





**A**

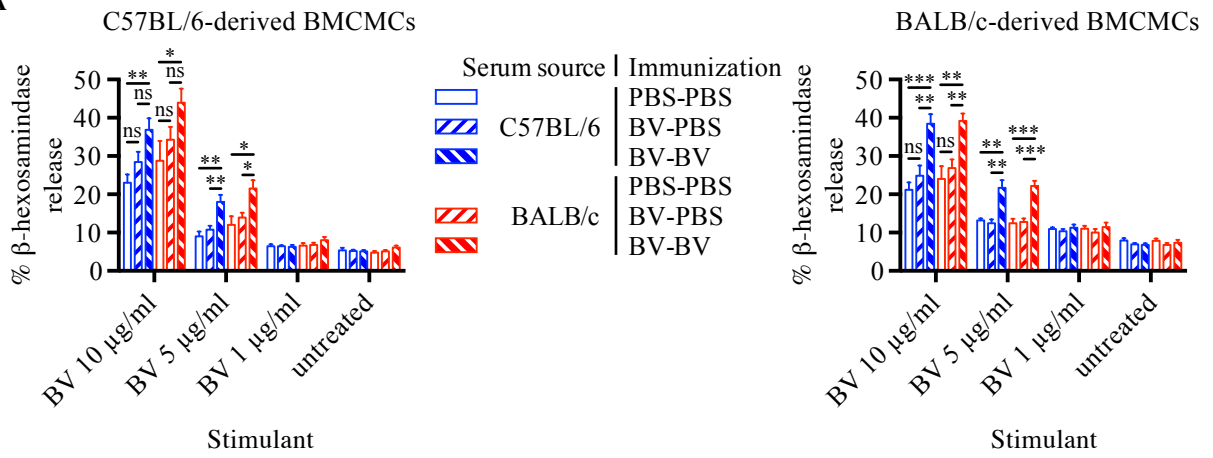

**B**

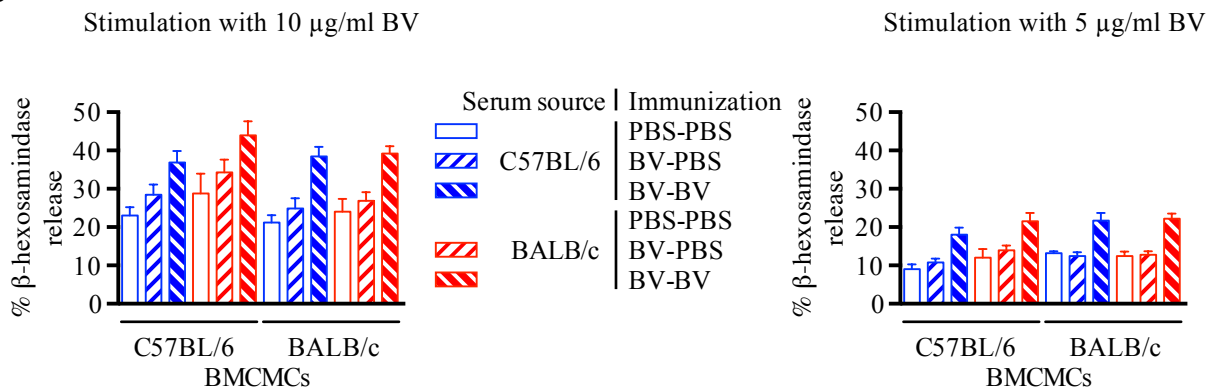

Supplement: NIHMS718821-supplement-01.pdf [file NIHMS718821-supplement-01.pdf]
